# Supplementary material for: Synthesizing developmental trajectories
Source: PubMed Central journal article supplement (PMC5619836; doi:10.1371/journal.pcbi.1005742), 2017-09-18
Supplement: pcbi.1005742.s005.pdf [file pcbi.1005742.s005.pdf]

|            | Live Movies | Dataset 1 | Dataset 2 | Dataset 3 | Dataset 4 |
|------------|-------------|-----------|-----------|-----------|-----------|
| $\epsilon$ | 0.01        | 0.01      | 0.01      | 0.05      | 0.01      |
| $c$        | 10          | 10        | 10        | 5         | 10        |
| $a$        | 10          | 10        | 10        | 15        | 10        |
| $b$        | 0.8         | 1.0       | 1.0       | 0.5       | 1.0       |

Values of the parameters for intensity renormalization and contrast increase for each of the experimental datasets (S1 Text).
