# Supplementary material for: Synthesizing developmental trajectories
Source: PubMed Central journal article supplement (PMC5619836; doi:10.1371/journal.pcbi.1005742), 2017-09-18
Supplement: pcbi.1005742.s006.pdf [file pcbi.1005742.s006.pdf]

|                   | Live Movies            | Dataset 1              | Dataset 2              | Dataset 3              | Dataset 4              |
|-------------------|------------------------|------------------------|------------------------|------------------------|------------------------|
| $m = 1$<br>dpERK  | $\overline{\Omega(1)}$ | $\Omega(1)$            | $\Omega(1)$            | $\Omega(1)$            | $\overline{\Omega(1)}$ |
| $m = 2$<br>Twist  | $\overline{\Omega(2)}$ | $\Omega(2)$            | $\overline{\Omega(2)}$ | $\overline{\Omega(2)}$ | $\Omega(2)$            |
| $m = 3$<br>Dorsal | $\overline{\Omega(3)}$ | $\overline{\Omega(3)}$ | $\Omega(3)$            | $\overline{\Omega(3)}$ | $\overline{\Omega(3)}$ |
| $m = 4$<br>ind    | $\overline{\Omega(4)}$ | $\overline{\Omega(4)}$ | $\Omega(4)$            | $\Omega(4)$            | $\Omega(4)$            |
| $m = 5$<br>rho    | $\overline{\Omega(5)}$ | $\overline{\Omega(5)}$ | $\overline{\Omega(5)}$ | $\Omega(5)$            | $\Omega(5)$            |

Distribution of the datasets into labeled and unlabeled sets depending on the modality. We refer to  $\Omega(m)$  as the set of labeled datapoints, while  $\overline{\Omega(m)}$  is the set of unlabeled data points for the  $m$ th modality.
