# Supplementary material for: Synthesizing developmental trajectories
Source: PubMed Central journal article supplement (PMC5619836; doi:10.1371/journal.pcbi.1005742), 2017-09-18
Supplement: pcbi.1005742.s007.pdf [file pcbi.1005742.s007.pdf]

|           | Normalized Absolute Error (in %)<br>309 unlabeled data points |
|-----------|---------------------------------------------------------------|
| Dataset 1 |                                                               |
| dpERK     | 2.37                                                          |
| Twist     | 2.03                                                          |
| Dataset 2 |                                                               |
| dpERK     | 2.01                                                          |
| Dorsal    | 1.10                                                          |
| ind       | 1.45                                                          |
| Dataset 3 |                                                               |
| dpERK     | 1.57                                                          |
| ind       | 0.9                                                           |
| rho       | 1.11                                                          |
| Dataset 4 |                                                               |
| Twist     | 2.18                                                          |
| ind       | 1.63                                                          |
| rho       | 1.84                                                          |

Normalized Absolute Error obtained by K-fold cross-validation for each modality of each dataset. In each case, we performed 10 repetitions, where the labeled samples are distributed randomly among the K bins, and the 309 unlabeled data points are chosen randomly. The error is then averaged over 10 repetitions. More details about the Normalized Absolute Error can be found in S1 Text.
