# Supplementary material for: Synthesizing developmental trajectories
Source: PubMed Central journal article supplement (PMC5619836; doi:10.1371/journal.pcbi.1005742), 2017-09-18
Supplement: pcbi.1005742.s008.pdf [file pcbi.1005742.s008.pdf]

|        | R   | G   | B   |
|--------|-----|-----|-----|
| dpERK  | 213 | 36  | 2   |
| Twist  | 92  | 188 | 146 |
| Dorsal | 229 | 195 | 207 |
| ind    | 103 | 139 | 191 |
| rho    | 225 | 223 | 75  |

Color scheme used to color the final movie.
